# Supplementary material for: Photoresponsive aqueous foams with controllable stability from nonionic azobenzene surfactants in multiple-component systems
Source: Royal Society of Chemistry journal article supplement (doi:10.1039/c9sm01379b), 2019-01-01
Supplement: c9sm01379b1.pdf [file c9sm01379b1.pdf]

## Support Information

# Photoresponsive aqueous foams with controllable stability from nonionic azobenzene surfactants in multiple-components systems

*Shaoyu Chen, Liang Fei, Fangqing Ge, Chaoxia Wang\**

Key Laboratory of Eco-Textile, Ministry of Education, College of Textile & Clothing,

Jiangnan University, 1800 Lihu Road, Wuxi 214122, People's Republic of China.

Corresponding author's e-mail: wangchaoxia@sohu.com.

## Synthesis of BEO-n-Azo

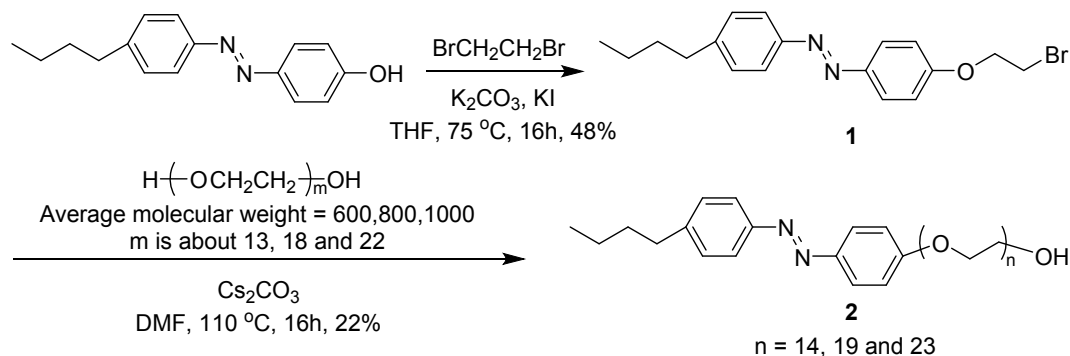

**Scheme S1.** Synthetic route of nonionic azobenzene surfactants (BEO-n-Azo, 2).

**Materials.** 4-butyl-4'-hydroxyazobenzene (>98.0%) was purchased from Shanghai Dibai Biotechnology Co., Ltd. 1,2-dibromoethane (>99.0%), potassium carbonate ( $\text{K}_2\text{CO}_3$ ; >99.0%), tetrahydrofuran (THF; >99.0%), N,N-Dimethylformamide (DMF; >99.5%), ethyl acetate (EtOAc; >99.5%), petroleum ether (60–90  $^\circ\text{C}$ , 99%), dichloromethane ( $\text{CH}_2\text{Cl}_2$ ; >99.5%), Methanol (MeOH, >99.5%) and silica gel (FCP) were bought from Sinopharm Chemical Reagent Co., Ltd. Potassium iodide (KI; >99.0%), Caesium carbonate ( $\text{Cs}_2\text{CO}_3$ ; >99.0%), polyethylene glycol (PEG Mw. =600, 800 and 1000) were purchased from Aladdin Industrial Inc. All the chemicals were used as received. Deionized water was used in all experiments.

### Compound 1:

4.5 g of 1,2-dibromoethane (3 *eq*) and KOH (3 *eq*) were placed in 40 ml THF and maintained at  $75\text{ }^\circ\text{C}$  for 0.5 h, accompanying with vigorous stirring in the three-necks flask. Thereafter, 4-butyl-4'-hydroxyazobenzene (1 *eq*) dissolved in THF was dropwise added to the flask and thoroughly stirred at  $75\text{ }^\circ\text{C}$  for 16 h in reflux condition. Then, the reaction system was cooled to ambient temperature, followed by removing THF via a rotary evaporator under reduced

pressure. Furthermore, the crude was extracted by EtOAc. The EtOAc was removed by rotary evaporation and the residue was purified by column chromatography (SiO<sub>2</sub>, petroleum ether/EtOAc 7/1) to yield **1** as a yellow solid. Yield: 48% (0.97g). <sup>1</sup>H NMR spectrum (400 MHz, CDCl<sub>3</sub>) δ 7.86 (dd, J = 39.2, 8.5 Hz, 4H), 7.31 (d, J = 8.2 Hz, 2H), 7.02 (d, J = 8.9 Hz, 2H), 4.37 (t, J = 6.3 Hz, 2H), 3.68 (t, J = 6.3 Hz, 2H), 2.69 (t, J = 7.7 Hz, 2H), 1.72 – 1.60 (m, 2H), 1.39 (m, 2H), 0.95 (t, J = 7.3 Hz, 3H).

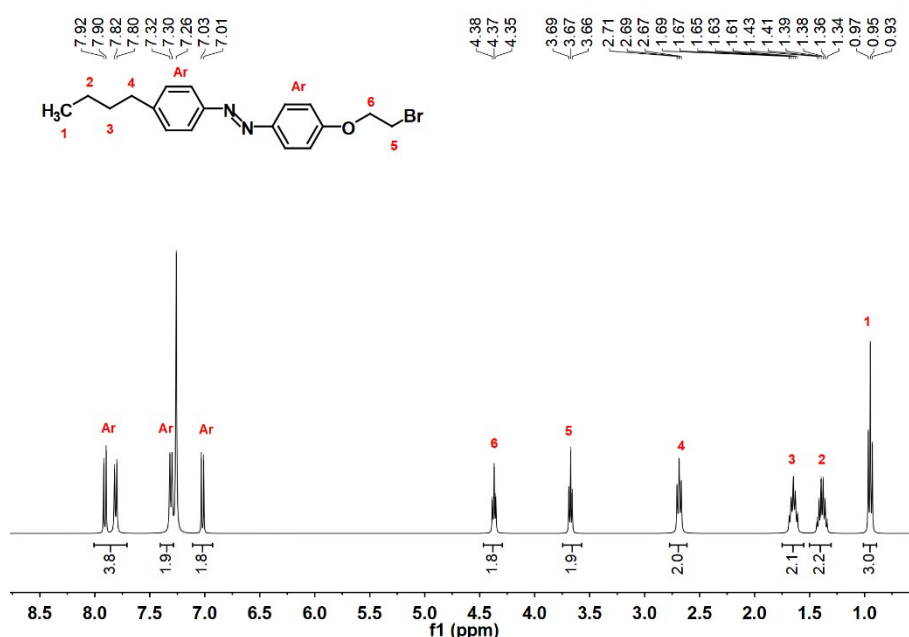

**Figure S1.** <sup>1</sup>H-NMR spectrum of compound 1.

### Compound 2 (BEO-n-Azo):

The mixture of polyethylene glycol (2.5 eq, the average molecular weights were 600, 800 and 1000, respectively) and Cs<sub>2</sub>CO<sub>3</sub> (5eq) in DMF (15mL) were heated to 110 °C, followed by adding the solution of compound **1** (0.9 g, dissolved in 5 mL DMF) dropwise and thoroughly stirred at 110 °C for 16 h. After cooling to room temperature, the reaction mixture was extracted with CH<sub>2</sub>Cl<sub>2</sub> and brine and the combined organic layers were dried over Na<sub>2</sub>SO<sub>4</sub>. The solvent

was evaporated and the residue was purified by column chromatography ( $\text{SiO}_2$ ,  $\text{CH}_2\text{Cl}_2/\text{MeOH}$  10/1) to yield **2** as a yellow oil. Yield: 22%.  $^1\text{H}$  nuclear magnetic resonance measurement was performed to confirm the structure of BEO-n-Azo ( $n=14, 19, 23$ ), as shown in Figure S2-4.

BEO-14-Azo:  $^1\text{H}$  NMR (400 MHz,  $\text{CD}_3\text{OD}$ )  $\delta$  7.85 (dd,  $J = 45.5, 8.7$  Hz, 4H), 7.34 (d,  $J = 8.3$  Hz, 2H), 7.16 (d,  $J = 9.0$  Hz, 2H), 4.14 (t,  $J = 4.6$  Hz, 2H), 3.91 (t,  $J = 4.8$  Hz, 2H), 3.82 (t,  $J = 5.7$  Hz, 2H), 3.76 – 3.56 (m, 50H), 2.69 (t,  $J = 7.7$  Hz, 2H), 1.65 (m, 2H), 1.40 (m, 2H), 0.96 (t,  $J = 7.4$  Hz, 3H).

BEO-19-Azo:  $^1\text{H}$  NMR (400 MHz,  $\text{CD}_3\text{OD}$ )  $\delta$  7.86 (dd,  $J = 45.6, 8.7$  Hz, 4H), 7.34 (d,  $J = 8.3$  Hz, 2H), 7.17 (d,  $J = 8.9$  Hz, 2H), 4.15 (t,  $J = 4.9, 4.5$  Hz, 2H), 3.91 (t,  $J = 4.9$  Hz, 2H), 3.81 (t,  $J = 4.6$  Hz, 2H), 3.55-3.68 (m, 70H), 2.70 (t,  $J = 7.6$  Hz, 2H), 1.65 (m, 2H), 1.39 (m, 2H), 0.96 (t,  $J = 7.4$  Hz, 3H).

BEO-23-Azo:  $^1\text{H}$  NMR (400 MHz,  $\text{CD}_3\text{OD}$ )  $\delta$  7.86 (dd,  $J = 45.7, 8.7$  Hz, 4H), 7.34 (d,  $J = 8.3$  Hz, 2H), 7.17 (d,  $J = 8.9$  Hz, 2H), 4.15 (t,  $J = 5.0, 4.4$  Hz, 2H), 3.91 (t,  $J = 4.8$  Hz, 2H), 3.82 (t,  $J = 4.5$  Hz, 2H), 3.75 – 3.51 (m, 86H), 2.70 (t,  $J = 7.7$  Hz, 2H), 1.65 (m, 2H), 1.40 (m, 2H), 0.96 (t,  $J = 7.4$  Hz, 3H).

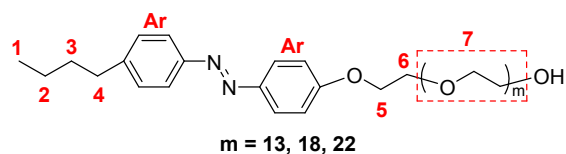

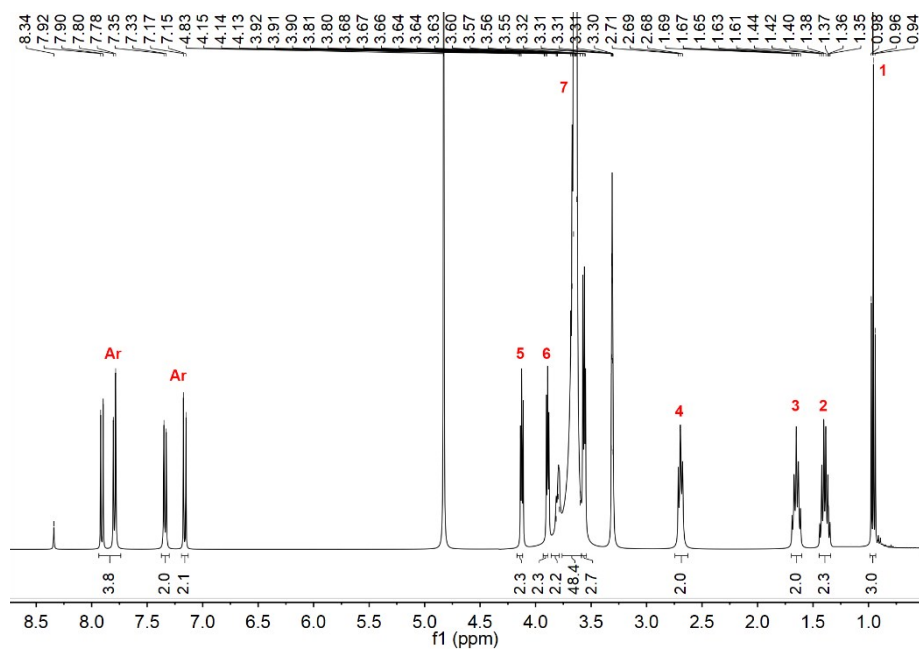

**Figure S2.**  $^1\text{H}$ -NMR spectrum of BEO-14-Azo

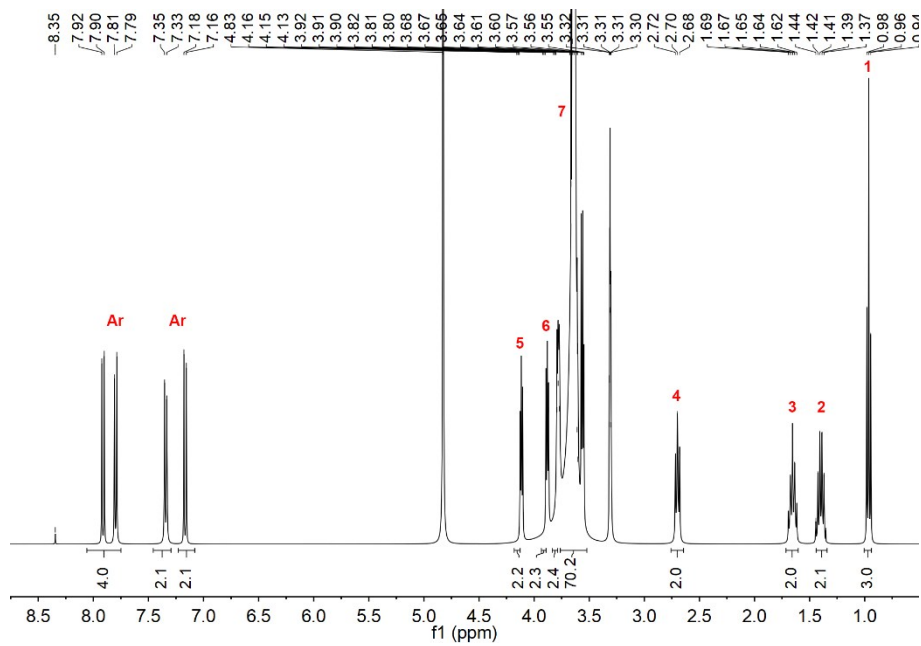

**Figure S3.**  $^1\text{H}$ -NMR spectrum of BEO-19-Azo

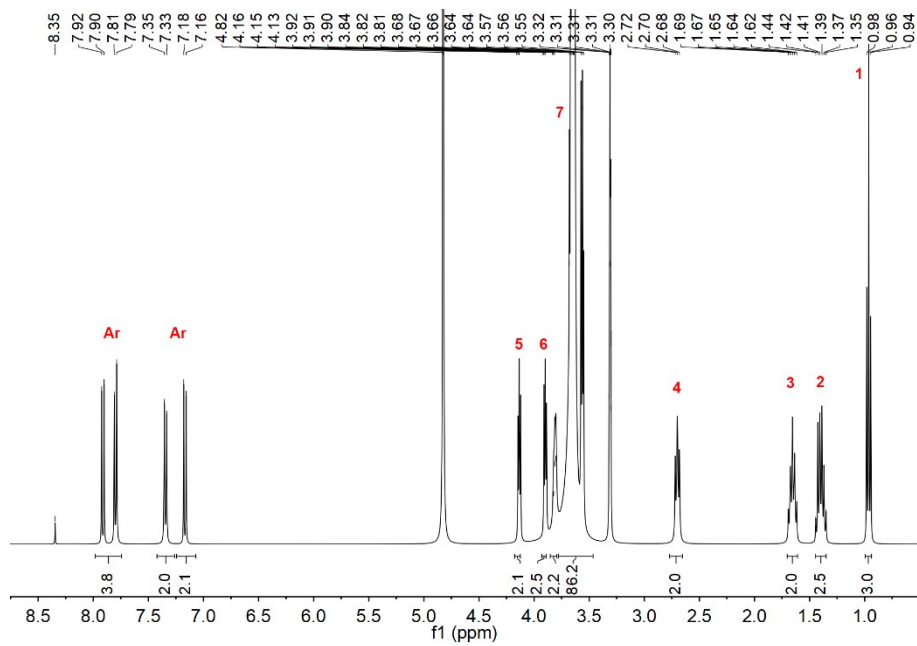

**Figure S4.**  $^1\text{H}$ -NMR spectrum of BEO-19-Azo
